# Supplementary material for: Benchmarking workflows to assess performance and suitability of germline variant calling pipelines in clinical diagnostic assays
Source: PubMed Central journal article supplement (PMC7903625; doi:10.1186/s12859-020-03934-3), 2021-02-24

Additional file 17: Fig S1. InDel size distribution histograms for NA24385 as generated by the benchmarking workflow for the coding exons of ~7000 clinically relevant genes and whole exome regions (as specified in Methods).

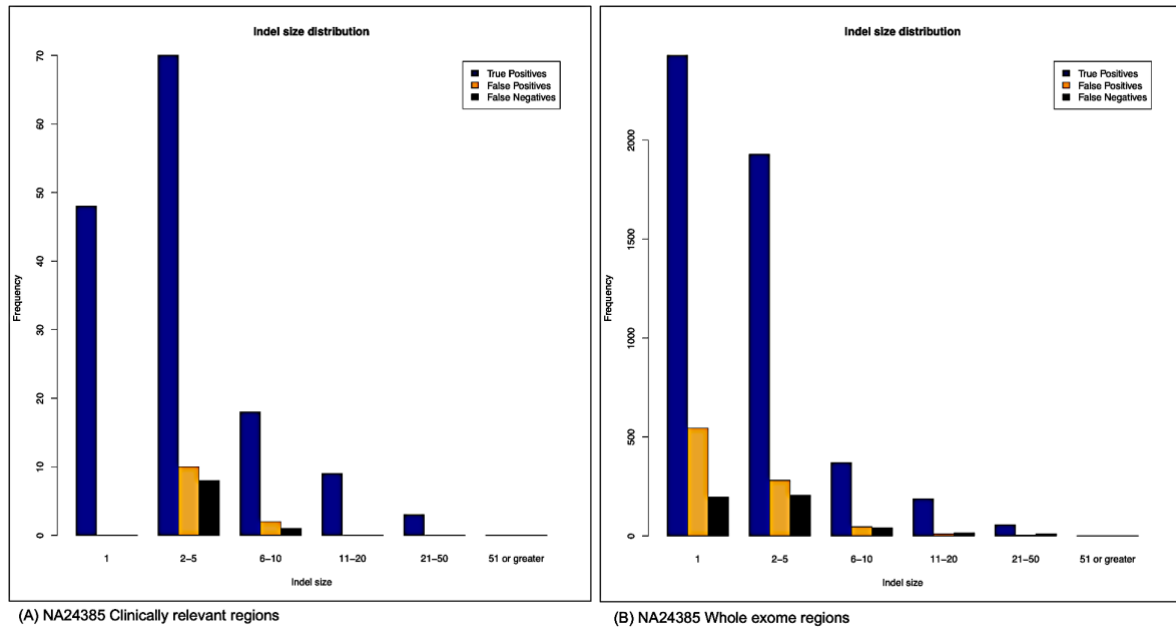

Supplement: 12859_2020_3934_MOESM17_ESM.pdf [file 12859_2020_3934_MOESM17_ESM.pdf]
