# Supplementary material for: Benchmarking workflows to assess performance and suitability of germline variant calling pipelines in clinical diagnostic assays
Source: PubMed Central journal article supplement (PMC7903625; doi:10.1186/s12859-020-03934-3), 2021-02-24

Additional file 18: Fig S2. ROC curves for NA24143 within coding exons of ~7000 clinically relevant genes using RTG rocplot with metrics obtained from RTG vcfeval.

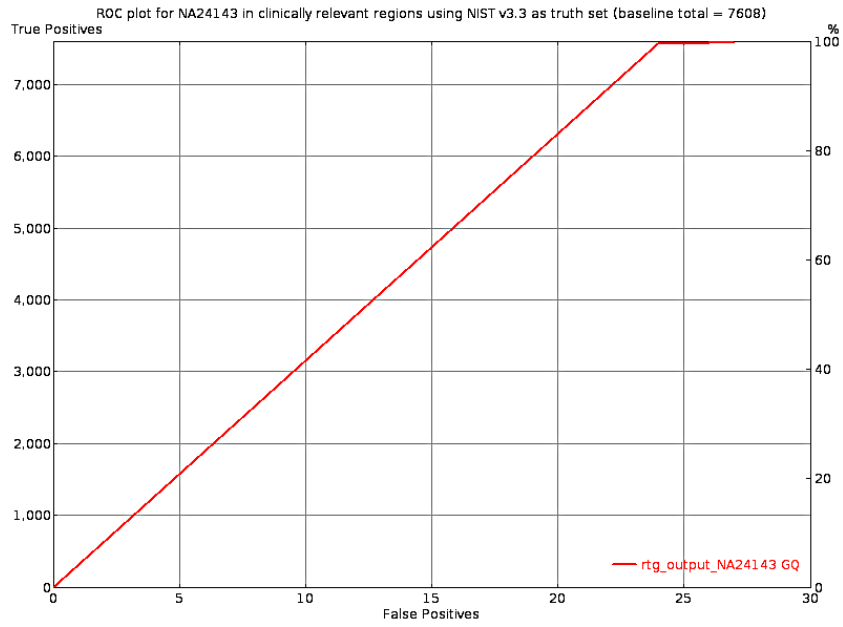

Supplement: 12859_2020_3934_MOESM18_ESM.pdf [file 12859_2020_3934_MOESM18_ESM.pdf]
